# Supplementary material for: Chemically distinct particle phase emissions from highly controlled pyrolysis of three wood types
Source: Copernicus journal article supplement (doi:10.5194/acp-2022-535), 2022-08-12
Supplement: Supplementary file 1 [file acp-2022-535-supplement.pdf]

# Supplement to: Chemically distinct emissions from highly controlled pyrolysis of three wood types

5 Anita M. Avery<sup>1</sup>, Mariam Fawaz<sup>2</sup>, Leah R. Williams<sup>1</sup>, Tami Bond<sup>3,4</sup>, Timothy B. Onasch<sup>5</sup>

<sup>1</sup>Center for Aerosol and Cloud Chemistry, Aerodyne Research, Inc., Billerica, MA 01821, USA

<sup>2</sup>Department of Civil and Environmental Engineering, University of Illinois, Urbana-Champaign, Urbana, IL 61801, USA

<sup>3</sup>Department of Mechanical Engineering, Colorado State University, Ft Collins, CO USA

<sup>4</sup>Department of Civil and Environmental Engineering, Colorado State University, Ft Collins, CO 80521, USA

10 <sup>5</sup>Center for Sensor Systems and Technology, Aerodyne Research, Inc., Billerica, MA 01821, USA

*Correspondence to:* Anita Avery (aavery@aerodyne.com)

## SI.1 Changes to the standard fragmentation table for high resolution analyses

The CO<sup>+</sup> fragment was the primary contributor to total organic mass loading but could only be fit and quantified at  
15 high signal levels due to its proximity to N<sub>2</sub><sup>+</sup>. This reduces our ability to quantify the comparatively low loading at the start  
and end of each experiment. When CO<sup>+</sup> was not quantifiable at low loadings, but CO<sub>2</sub><sup>+</sup> was, the experiment median  
CO<sup>+</sup>/CO<sub>2</sub><sup>+</sup> ratio was used to quantify CO<sup>+</sup>. When CO<sub>2</sub><sup>+</sup> was below detection (defined as 3σ of filtered air), the data were not  
used for chemical analysis.

Another change from the standard high-resolution AMS analysis was to use the HR fragmentation table for m/z 15.  
20 Using standard fitting, some of the CH<sub>3</sub><sup>+</sup> signal was apportioned to NH<sup>+</sup> because the CH<sub>3</sub><sup>+</sup> signal was so large. Upon further  
inspection there was no correlation between NH<sup>+</sup> and other ammonium-related fragments, so NH<sup>+</sup> in the high resolution  
fragmentation table was set equal to 0.1\*NH<sub>2</sub><sup>+</sup>, the same relationship as in the unit mass resolution fragmentation table  
(Allan et al. 2004).

25

30

**Table S1. Median fractional contribution of each ion to total organic mass in Figure 5.**

| Temp (°C) | Size | Wood  | $f_{\text{CO}^+}$ | $f_{\text{C}_2\text{H}_4\text{O}_2^+}$ | $f_{\text{CHO}^+}$ | $f_{\text{C}_9\text{H}_7^+}$ | $f_{\text{C}_9\text{H}_{11}\text{O}_3^+}$ | $f_{\text{C}_9\text{H}_{11}^+}$ |
|-----------|------|-------|-------------------|----------------------------------------|--------------------|------------------------------|-------------------------------------------|---------------------------------|
| 400       | S    | Maple | 0.14              | 0.027                                  | 0.042              | 2.8E-03                      | 8.1E-03                                   | 3.6E-04                         |
| 400       | S    | Maple | 0.14              | 0.026                                  | 0.044              | 2.7E-03                      | 7.8E-03                                   | 3.7E-04                         |
| 500       | S    | Maple | 0.15              | 0.025                                  | 0.038              | 4.3E-03                      | 5.0E-03                                   | 4.0E-04                         |
| 500       | S    | Maple | 0.14              | 0.027                                  | 0.038              | 4.6E-03                      | 5.6E-03                                   | 3.9E-04                         |
| 600       | S    | Maple | 0.22              | 0.018                                  | 0.030              | 5.4E-03                      | 4.4E-04                                   | 2.1E-04                         |
| 600       | S    | Maple | 0.22              | 0.017                                  | 0.030              | 5.6E-03                      | 5.1E-04                                   | 2.1E-04                         |
| 500       | S    | Oak   | 0.22              | 0.025                                  | 0.048              | 3.0E-03                      | 4.7E-03                                   | 4.7E-04                         |
| 500       | M    | Oak   | 0.22              | 0.024                                  | 0.047              | 3.0E-03                      | 5.3E-03                                   | 4.5E-04                         |
| 500       | L    | Oak   | 0.19              | 0.027                                  | 0.046              | 3.5E-03                      | 5.7E-03                                   | 4.6E-04                         |
| 600       | S    | Oak   | 0.25              | 0.025                                  | 0.049              | 4.0E-03                      | 1.0E-03                                   | 3.8E-04                         |
| 600       | M    | Oak   | 0.24              | 0.027                                  | 0.047              | 4.6E-03                      | 9.5E-04                                   | 4.1E-04                         |
| 600       | L    | Oak   | 0.20              | 0.031                                  | 0.043              | 6.0E-03                      | 5.8E-04                                   | 4.2E-04                         |
| 500       | S    | Fir   | 0.18              | 0.048                                  | 0.061              | 1.7E-03                      | 4.0E-05                                   | 2.7E-03                         |
| 500       | M    | Fir   | 0.15              | 0.035                                  | 0.066              | 2.2E-03                      | 6.6E-06                                   | 2.6E-03                         |
| 500       | L    | Fir   | 0.14              | 0.029                                  | 0.058              | 2.4E-03                      | 2.6E-05                                   | 1.5E-03                         |
| 600       | S    | Fir   | 0.20              | 0.044                                  | 0.075              | 1.9E-03                      | 3.5E-05                                   | 1.1E-03                         |
| 600       | M    | Fir   | 0.13              | 0.032                                  | 0.072              | 2.3E-03                      | 0.0E+00                                   | 9.8E-04                         |
| 600       | L    | Fir   | 0.12              | 0.030                                  | 0.067              | 2.8E-03                      | 0.0E+00                                   | 1.2E-03                         |

35

40

45 **Table S2. Median fractional contribution of each ion to total organic mass in Figure S2.**

| Temp (°C) | Size | Wood  | $f_{\text{C}_2\text{H}_3\text{O}^+}$ | $f_{\text{CO}_2^+}$ | $f_{\text{C}_3\text{H}_5\text{O}_2^+}$ |
|-----------|------|-------|--------------------------------------|---------------------|----------------------------------------|
| 400       | S    | Maple | 0.051                                | 0.013               | 0.012                                  |
| 400       | S    | Maple | 0.051                                | 0.014               | 0.012                                  |
| 500       | S    | Maple | 0.039                                | 0.015               | 0.010                                  |
| 500       | S    | Maple | 0.041                                | 0.013               | 0.011                                  |
| 600       | S    | Maple | 0.022                                | 0.022               | 0.006                                  |
| 600       | S    | Maple | 0.023                                | 0.022               | 0.006                                  |
| 500       | S    | Oak   | 0.033                                | 0.020               | 0.011                                  |
| 500       | M    | Oak   | 0.035                                | 0.019               | 0.011                                  |
| 500       | L    | Oak   | 0.039                                | 0.017               | 0.012                                  |
| 600       | S    | Oak   | 0.028                                | 0.031               | 0.010                                  |
| 600       | M    | Oak   | 0.029                                | 0.025               | 0.011                                  |
| 600       | L    | Oak   | 0.030                                | 0.019               | 0.012                                  |
| 500       | S    | Fir   | 0.033                                | 0.018               | 0.015                                  |
| 500       | M    | Fir   | 0.031                                | 0.020               | 0.011                                  |
| 500       | L    | Fir   | 0.032                                | 0.019               | 0.010                                  |
| 600       | S    | Fir   | 0.033                                | 0.026               | 0.013                                  |
| 600       | M    | Fir   | 0.031                                | 0.024               | 0.010                                  |
| 600       | L    | Fir   | 0.030                                | 0.023               | 0.009                                  |

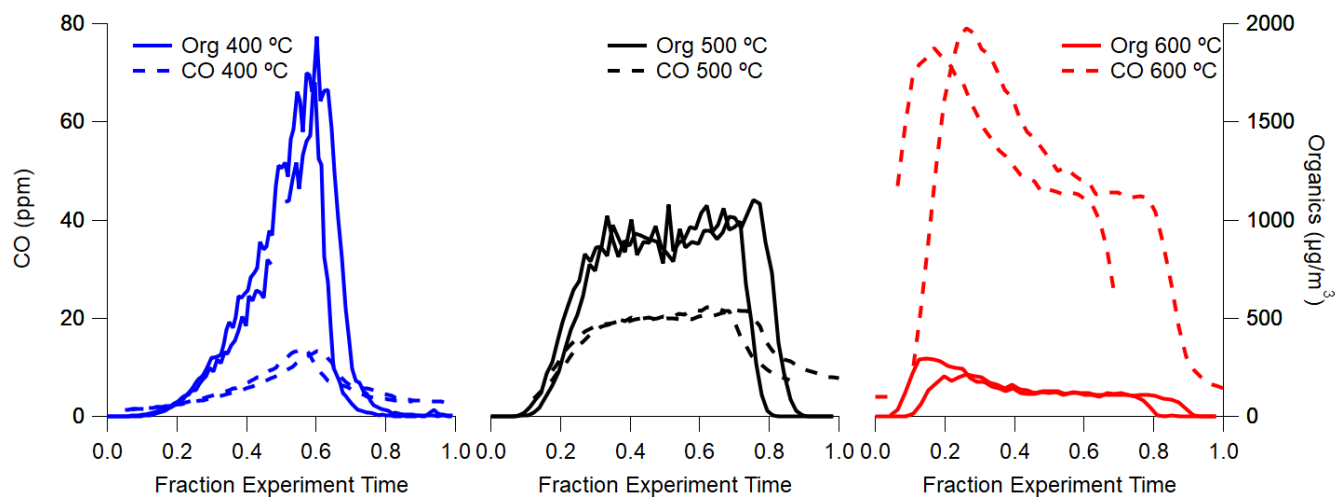

55

Figure S1. Small maple CO gas (left axis, dashed lines) and organic aerosol (right axis, solid lines) at each reactor temperature. Other woods showed a similar relationship between CO and organic aerosol with temperature change, where higher temperatures correspond to more CO and less aerosol.

60

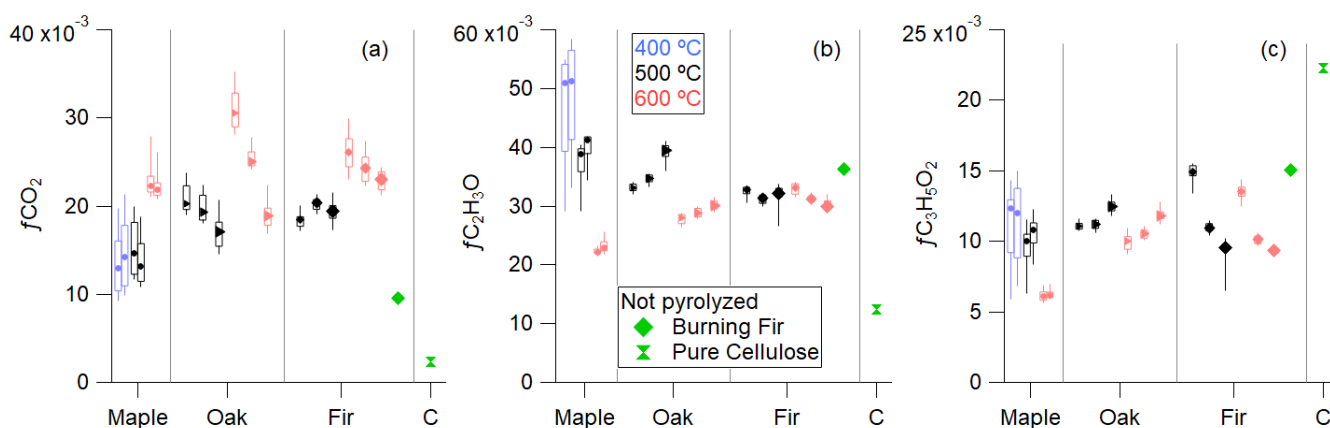

65

Figure S2. The fraction of  $C_2H_3O^+$  (a),  $C_3H_5O_2^+$  (b), and  $CO_2^+$  (c) in total organics for maple, oak, Douglas fir, burning fir and cellulose (C). Each plot is ordered by fuel, then temperature, then size and markers at median are sized by wood size. Bars of the box correspond to 25<sup>th</sup> and 75<sup>th</sup> percentiles, and whiskers correspond to 10<sup>th</sup> and 90<sup>th</sup> percentiles.

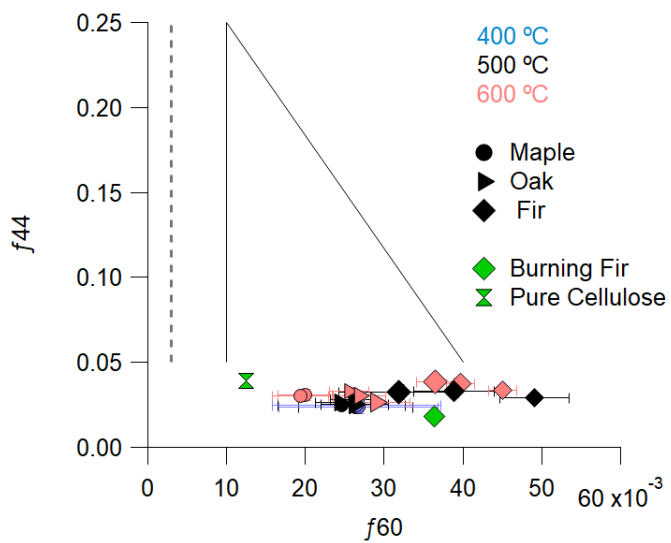

**Figure S3. Fraction of  $\text{CO}_2^+$  ( $m/z$  44) to fraction of  $\text{C}_2\text{H}_4\text{O}_2^+$  ( $m/z$  60) as a reference of atmospherically relevant biomass burning. Each value is an experiment average with bars indicating the standard deviation.**
